# Supplementary material
Source: publisher figshare collection journal article supplement (https://brill.figshare.com/articles/dataset/_/7041791)
Supplement: Supplementary file 1 [file 1]

**Table S2.** Summary of genetic polymorphism in inclusive/exclusive datasets (see Material and methods; supplementary table S1) of *Coronella austriaca* cyt *b* sequences: sample size (*n*), number of haplotypes (*h*), number of polymorphic sites (*S*), average number of nucleotide differences (*k*), nucleotide diversity ( $\pi$ ), haplotype diversity (*hd*), Watterson's theta per site ( $\theta_w$ ). SD = standard deviation.

| Clade                             | <i>n</i> | <i>h</i> | <i>S</i> | <i>k</i>    | $\pi \pm \text{SD}$ (%)        | <i>Hd</i> $\pm$ SD              | $\theta_w \pm \text{SD}$ (%)    |
|-----------------------------------|----------|----------|----------|-------------|--------------------------------|---------------------------------|---------------------------------|
| <b><i>Coronella austriaca</i></b> | 141/45   | 65/35    | 57/195   | 11.55/41.50 | 5.8 $\pm$ 0.21/4.7 $\pm$ 0.30  | 1.0 $\pm$ 0.005/1.0 $\pm$ 0.007 | 6.00 $\pm$ 1.74/5.38 $\pm$ 1.63 |
| <b>Anatolian 1</b>                | 10/9     | 7/6      | 8/26     | 2.77/9.53   | 0.9 $\pm$ 0.26/0.92 $\pm$ 0.36 | 0.90 $\pm$ 0.10/1.00 $\pm$ 0.10 | 1.08 $\pm$ 0.59/1.10 $\pm$ 0.55 |
| <b>Anatolian 2</b>                | 1/1      | 1/1      | -        | -           | -                              | -                               | -                               |
| <b>Balkan</b>                     | 18/14    | 11/10    | 11/37    | 4.58/15.58  | 1.5 $\pm$ 0.18/1.6 $\pm$ 0.24  | 0.93 $\pm$ 0.05/1.00 $\pm$ 0.05 | 1.12 $\pm$ 0.60/1.32 $\pm$ 0.57 |
| <b>Central European</b>           | 44/11    | 13/9     | 9/10     | 1.51/2.39   | 0.5 $\pm$ 0.09/0.2 $\pm$ 0.03  | 0.92 $\pm$ 0.07/1.00 $\pm$ 0.05 | 1.02 $\pm$ 0.50/0.36 $\pm$ 0.03 |
| <b>Eastern</b>                    | 15/3     | 6/3      | 9/14     | 3.53/9.33   | 1.2 $\pm$ 0.36/0.9 $\pm$ 0.37  | 0.93 $\pm$ 0.12/1.00 $\pm$ 0.27 | 1.31 $\pm$ 0.73/0.90 $\pm$ 0.58 |
| <b>Iberian 1</b>                  | 10/2     | 7/2      | 6/11     | 1.91/11.00  | 0.6 $\pm$ 0.01/1.1 $\pm$ 0.53  | 0.95 $\pm$ 0.10/1.00 $\pm$ 0.50 | 0.81 $\pm$ 0.47/1.06 $\pm$ 0.79 |
| <b>Iberian 2</b>                  | 5/-      | 4/-      | 11/-     | 5.83/13.00  | 1.9 $\pm$ 0.72/-               | 1.00 $\pm$ 0.17/-               | 1.98 $\pm$ 1.18/-               |
| <b>Iberian 3</b>                  | 11/-     | 4/-      | 9/-      | 4.83/-      | 1.6 $\pm$ 0.41/-               | 1.00 $\pm$ 0.17/-               | 1.62 $\pm$ 0.42/-               |
| <b>Iranian 1</b>                  | 1/1      | 1/1      | -        | -           | -                              | -                               | -                               |
| <b>Iranian 2</b>                  | 2/2      | 2/2      | 13/13    | 13.00/13.00 | 1.3 $\pm$ 0.63/1.3 $\pm$ 0.63  | 1.00 $\pm$ 0.50/1.00 $\pm$ 0.50 | 1.26 $\pm$ 0.93/1.26 $\pm$ 0.63 |
| <b>Sicilian</b>                   | 2/-      | 2/-      | 2/-      | 2.00/-      | 0.7 $\pm$ 0.33/-               | 1.00 $\pm$ 0.50/-               | 0.66 $\pm$ 0.57/-               |
| <b>Transcaucasian</b>             | 4/-      | 4/-      | 5/-      | 2.67/-      | 1.0 $\pm$ 0.33/-               | 1.00 $\pm$ 0.17/-               | 1.05 $\pm$ 0.69/-               |
| <b>Western 1</b>                  | 17/-     | 2/-      | 1/-      | 1.00/-      | 0.3 $\pm$ 0.17/-               | 1.00 $\pm$ 0.50/-               | 0.33 $\pm$ 0.33/-               |
| <b>Western 2</b>                  | 1/1      | 1/1      | -        | -           | -                              | -                               | -                               |
