# Supplementary material
Source: publisher figshare collection journal article supplement (https://brill.figshare.com/articles/dataset/_/7041791)
Supplement: Supplementary file 1 [file 1]

## Sheet: Sheet1
Table S1. Locality data, gene accession numbers, and source of all samples used in this study. Sequences of the samples originating from the same or nearby localities with the same haplotype were not used in analyses.
GenBank Accession Number	Internal id	Locality number	Locality name	Country	N	E	Clade	Source	Haplotype in published studies	Santos et al., 2008 clade	Sztencel-Jabłonka et al., 2015 clade	Galarza et al., 2015 clade	Dataset
EU022662	E2026.1	1	Serra da Estrela	Portugal	40.301	-7.62593	Iberian 1	Santos et al., 2008		Clade 1 (C. a. acutirostris)	Clade 1 Santos	Western	inclusive
EU022664	E2026.2	1	Serra da Estrela	Portugal	40.301	-7.62593	Iberian 1	Santos et al., 2008		Clade 1 (C. a. acutirostris)	Clade 1 Santos	Western	inclusive
EU022663	E2026.7	2	Northern Portugal	Portugal	41.7053	-7.6519	Iberian 1	Santos et al., 2008		Clade 1 (C. a. acutirostris)	Clade 1 Santos	Western	inclusive
EU022668	E2026.8	2	Northern Portugal	Portugal	41.7053	-7.6519	Iberian 1	Santos et al., 2008		Clade 1 (C. a. acutirostris)	Clade 1 Santos	Western	inclusive
EU022669	E27104.1	3	Pitoes	Portugal	41.8428	-7.95202	Iberian 1	Santos et al., 2008		Clade 1 (C. a. acutirostris)	Clade 1 Santos	Western	inclusive
JQ904296	DB2710	4	Ponte, ASE, Serra da Estrela	Portugal	40.3229	-7.59607	Iberian 3	Santos et al., 2012		Clade 3	Clade 3 Santos	Western	inclusive
MH382911	2475	5	Portela do Homen	Portugal	41.81	-8.13	Iberian 1	This study		Clade 1 (C. a. acutirostris)	Clade 1 Santos	Western	inclusive/exclusive
MH382915	649JAB	6	Senhora da Boa Estrela	Portugal	40.323	-7.602	Iberian 1	This study		Clade 1 (C. a. acutirostris)	Clade 1 Santos	Western	inclusive/exclusive
EU022652	E27104.4	7	Sierra Nevada, Granada	Spain	37.0947	-3.3971	Iberian 3	Santos et al., 2008		Clade 3	Clade 3 Santos	Western	inclusive
EU022653	E2007.1	7	Sierra Nevada, Granada	Spain	37.0947	-3.3971	Iberian 3	Santos et al., 2008		Clade 3	Clade 3 Santos	Western	inclusive
EU022655	E18124.1	8	Canejan, Lleida	Spain	42.8385	0.7393	Iberian 3	Santos et al., 2008		Clade 3	Clade 3 Santos	Western	inclusive
EU022656	E2606.1	9	Arguijo, Soria	Spain	41.9941	-2.4986	Iberian 3	Santos et al., 2008		Clade 3	Clade 3 Santos	Western	inclusive
EU022657	E2606.3	10	Puerto Piqueras, Soria	Spain	42.0621	-2.4547	Iberian 3	Santos et al., 2008		Clade 3	Clade 3 Santos	Western	inclusive
EU022658	E3010.5	11	Puertos de Beceite, Castellón	Spain	40.82	0.18	Iberian 3	Santos et al., 2008		Clade 3	Clade 3 Santos	Western	inclusive
EU022659	E27014.5	12	Valle de Anson, Navarra	Spain	42.7626	-0.829548	Iberian 3	Santos et al., 2008		Clade 3	Clade 3 Santos	Western	inclusive
EU022660	E2505.2	13	Lasarte, Alava	Spain	42.8278	-2.68512	Iberian 3	Santos et al., 2008		Clade 3	Clade 3 Santos	Western	inclusive
EU022661	E2026.4	14	Escoriaza, Alava	Spain	42.8611	-2.67926	Iberian 3	Santos et al., 2008		Clade 3	Clade 3 Santos	Western	inclusive
EU022665	E3010.3	15	Tendi Valley, Asturias	Spain	43.2491	-5.98161	Iberian 1	Santos et al., 2008		Clade 1 (C. a. acutirostris)	Clade 1 Santos	Western	inclusive
EU022666	E2026.3	16	Covanera, Burgos	Spain	42.7354	-3.7994	Iberian 1	Santos et al., 2008		Clade 1 (C. a. acutirostris)	Clade 1 Santos	Western	inclusive
EU022667	E2026.11	17	Sedano, Burgos	Spain	42.7177	-3.74816	Iberian 1	Santos et al., 2008		Clade 1 (C. a. acutirostris)	Clade 1 Santos	Western	inclusive
EU022672	E1406.30	18	El Espinero, Segovia	Spain	40.7178	-4.2468	Iberian 2	Santos et al., 2008		Clade 2	Clade 2 Santos	Western	inclusive
EU022673	E2026.5	19	Sierra de Guadarrama, Madrid	Spain	40.6731	-4.0875	Iberian 2	Santos et al., 2008		Clade 2	Clade 2 Santos	Western	inclusive
EU022674	E2026.6	20	Montes de Toledo, Toledo	Spain	39.5491	-4.33183	Iberian 2	Santos et al., 2008		Clade 2	Clade 2 Santos	Western	inclusive
EU022675	E2405.2	21	Riopar, Albacete	Spain	38.499	-2.4173	Iberian 2	Santos et al., 2008		Clade 2	Clade 2 Santos	Western	inclusive
JQ904297	DB2682	22	Miraﬂores de la Sierra, Madrid	Spain	40.8161	-3.76721	Iberian 2	Santos et al., 2012		Clade 2	Clade 2 Santos	Western	inclusive
KM435300	FRROUFFA53-57	23	Bollenberg	France	47.9571	7.06021	Western 1	Galarza et al., 2015		no name	Western	Western	inclusive
KM435301	FRROUFFA55	23	Bollenberg	France	47.9571	7.06021	Western 1	Galarza et al., 2015		no name	Western	Western	inclusive
EU022649	E1511.9	24	Tigouleix, Creuse	France	46.0377	2.0627	Western 1	Santos et al., 2008		no name	Western	Western	inclusive
EU022650	E1110.10	24	Merindal, Creuse	France	46.0377	2.0627	Western 1	Santos et al., 2008		no name	Western	Western	inclusive
EU022654	E3010.4	25	Canigou	France	42.5184	2.46161	Iberian 3	Santos et al., 2008		Clade 3	Clade 3 Santos	Western	inclusive
	UKARNE0019-21	26	Dorset	United Kingdom	50.6943	-2.04149	Western 1	Galarza et al., 2015		no name	Western	Western	inclusive
	UKGODLIN22-25	27	Dorset	United Kingdom	50.6525	-2.04984	Western 1	Galarza et al., 2015		no name	Western	Western	inclusive
	UKPUDDLE17,18	28	Dorset	United Kingdom	50.7342	-2.37044	Western 1	Galarza et al., 2015		no name	Western	Western	inclusive
	UKWAREHA26-32	29	Dorset	United Kingdom	50.7209	-2.15119	Western 1	Galarza et al., 2015		no name	Western	Western	inclusive
EU022648	E27104.2	30	Hampshire	United Kingdom	51.1619	-0.1996	Western 1	Santos et al., 2008		no name	Western	Western	inclusive
EU022651	E27104.0	31	Vorarlberg	Austria	47.2497	9.9797	Western 1	Santos et al., 2008		no name	Western	Western	inclusive
	GERBRACH36	32	Brachttal	Germany	50.2003	9.14859	Western 1	Galarza et al., 2015		no name	Western	Western	inclusive
	GERPARTE33	33	Partenstein	Germany	50.0416	9.52009	Western 1	Galarza et al., 2015		no name	Western	Western	inclusive
	GERSCHLI35	34	Schlierbach	Germany	49.3111	8.6776	Western 1	Galarza et al., 2015		no name	Western	Western	inclusive
	GERSCHWA41	35	Berkhof	Germany	52.4121	9.69814	Western 1	Galarza et al., 2015		no name	Western	Western	inclusive
	SWMUNCHE39	36	Münchenstein	Switzerland	47.5203	7.56488	Western 1	Galarza et al., 2015		no name	Western	Western	inclusive
	ITMILANO44	37	Milano	Italy	45.4637	9.18817	Western 1	Galarza et al., 2015		no name	Western	Western	inclusive
	ITPAVIA037	38	Pavia	Italy	45.1859	9.15656	Western 1	Galarza et al., 2015		no name	Western	Western	inclusive
EU022646	E3010.1	39	Treviso	Italy	45.6669	12.243	Central European	Santos et al., 2008		no name	North Balkan	Central	inclusive
EU022670	E3026.16	40	Etna, Adrano, Sicily	Italy	37.7249	14.9394	Sicilian	Santos et al., 2008		C. a. fitzingeri (no other name)	no name	Western	inclusive
EU022671	E3026.17	41	Etna, Saifio, Sicily	Italy	37.7249	14.9394	Sicilian	Santos et al., 2008		C. a. fitzingeri (no other name)	no name	Western	inclusive
MH382919	1067JAB	42	Monte Rufeno	Italy	42.795	11.91	Western 2	This study		not recovered	not recovered	not recovered	inclusive/exclusive
	NORAUREB05	43	Aurebekk	Norway	58.1409	7.69683	Central European	Galarza et al., 2015		no name	North Balkan	Central	inclusive
	NORHOLME02,03,06	44	Holmesland	Norway	58.1319	7.50268	Central European	Galarza et al., 2015		no name	North Balkan	Central	inclusive
	NORLANGE04, NORSODEL07	45	Langeland, Sodeland	Norway	58.0767	7.51463	Central European	Galarza et al., 2015		no name	North Balkan	Central	inclusive
	SWEOREBR09-14	46	Örebro	Sweden	59.3756	15.0125	Central European	Galarza et al., 2015		no name	North Balkan	Central	inclusive
	SWEOSTER15,16	47	Örebro	Sweden	58.6368	16.6646	Central European	Galarza et al., 2015		no name	North Balkan	Central	inclusive
KM435298	ALFINSTR01,04,05,08-13,42,45,46,60, ALHAMMAR39,40,43,44, ALLANGNA43	48	Åland, Finström	Finland	60.2209	19.8341	Central European	Galarza et al., 2015		no name	North Balkan	Central	inclusive
	ALFINSTR02	48	Åland, Finström	Finland	60.2209	19.8341	Central European	Galarza et al., 2015		no name	North Balkan	Central	inclusive
	ALFINSTR03	48	Åland, Finström	Finland	60.2209	19.8341	Central European	Galarza et al., 2015		no name	North Balkan	Central	inclusive
	ALHAMMAR14	49	Åland, Finström	Finland	60.1689	19.8037	Central European	Galarza et al., 2015		no name	North Balkan	Central	inclusive
	ALHAMMAR29-31,37,38	50	Åland, Finström	Finland	60.2557	19.7086	Central European	Galarza et al., 2015		no name	North Balkan	Central	inclusive
	ALHAMMAR49	51	Åland, Hammarland	Finland	60.1522	19.7795	Central European	Galarza et al., 2015		no name	North Balkan	Central	inclusive
	ALHAMMAR52,57	52	Åland, Hammarland	Finland	60.2176	19.7397	Central European	Galarza et al., 2015		no name	North Balkan	Central	inclusive
	ALINGBY006, ALJOMALA32,33	53	Åland, Jomala	Finland	60.1747	19.943	Central European	Galarza et al., 2015		no name	North Balkan	Central	inclusive
	ALJOMALA15-18,20-28	54	Åland, Jomala	Finland	60.1431	19.9164	Central European	Galarza et al., 2015		no name	North Balkan	Central	inclusive
	ALJOMALA55,61,62	55	Åland, Jomala	Finland	60.1522	19.9486	Central European	Galarza et al., 2015		no name	North Balkan	Central	inclusive
	ALLEMLAN36	56	Åland, Lemland	Finland	60.0667	20.0901	Central European	Galarza et al., 2015		no name	North Balkan	Central	inclusive
	ALMARIEN41	57	Åland, Mariehamn	Finland	60.1334	19.9344	Central European	Galarza et al., 2015		no name	North Balkan	Central	inclusive
	ALSALTVI48, 51, 59	58	Åland, Saltvik	Finland	60.2755	20.0619	Central European	Galarza et al., 2015		no name	North Balkan	Central	inclusive
	ALSUND0007,35,47	59	Åland, Sund	Finland	60.2521	20.112	Central European	Galarza et al., 2015		no name	North Balkan	Central	inclusive
	ALSUND0019	60	Åland, Sund	Finland	60.2741	20.2396	Central European	Galarza et al., 2015		no name	North Balkan	Central	inclusive
	ALSUND0034,50,53,54,58	61	Åland, Sund	Finland	60.251	20.1068	Central European	Galarza et al., 2015		no name	North Balkan	Central	inclusive
KM435299	ALJOMALA56	62	Åland, Jomala	Finland	60.1522	19.9486	Central European	Galarza et al., 2015		no name	North Balkan	Central	inclusive
	POLKRAKO43	63	Krakow	Poland	50.0647	19.945	Central European	Galarza et al., 2015		no name	North Balkan	Central	inclusive
KP756615	5923, 5924, 7399	64		Poland	52.5477	19.232	Central European	Sztencel-Jabłonka et al., 2015	h1	no name	North Balkan	Central	-
KP756615	7392	65		Poland	52.5476	19.2344	Central European	Sztencel-Jabłonka et al., 2015	h1	no name	North Balkan	Central	-
KP756615	7393	66		Poland	52.5969	19.087	Central European	Sztencel-Jabłonka et al., 2015	h1	no name	North Balkan	Central	-
KP756615	7448, 7450, 7451, 8269	67		Poland	52.558	19.2145	Central European	Sztencel-Jabłonka et al., 2015	h1	no name	North Balkan	Central	-
KP756615	7449	68		Poland	52.5911	19.187	Central European	Sztencel-Jabłonka et al., 2015	h1	no name	North Balkan	Central	-
KP756615	5493	69		Poland	52.7737	14.3022	Central European	Sztencel-Jabłonka et al., 2015	h1	no name	North Balkan	Central	-
KP756615	6606-6608	70		Poland	53.3722	14.8617	Central European	Sztencel-Jabłonka et al., 2015	h1	no name	North Balkan	Central	-
KP756615	6611	71		Poland	53.3906	14.7006	Central European	Sztencel-Jabłonka et al., 2015	h1	no name	North Balkan	Central	-
KP756615	7430	72		Poland	53.4052	14.7079	Central European	Sztencel-Jabłonka et al., 2015	h1	no name	North Balkan	Central	-
KP756615	6604, 6605	73		Poland	51.7083	14.8603	Central European	Sztencel-Jabłonka et al., 2015	h1	no name	North Balkan	Central	-
KP756615	6591-6593	74		Poland	51.4789	15.3642	Central European	Sztencel-Jabłonka et al., 2015	h1	no name	North Balkan	Central	-
KP756615	7412-7418	75		Poland	51.4829	15.3823	Central European	Sztencel-Jabłonka et al., 2015	h1	no name	North Balkan	Central	-
KP756615	5838, 5912, 6573-6582	76		Poland	49.4098	20.4013	Central European	Sztencel-Jabłonka et al., 2015	h1	no name	North Balkan	Central	-
KP756615	6572, 7481	77		Poland	49.541	20.4025	Central European	Sztencel-Jabłonka et al., 2015	h1	no name	North Balkan	Central	-
KP756615	6601	78		Poland	49.5525	20.6572	Central European	Sztencel-Jabłonka et al., 2015	h1	no name	North Balkan	Central	-
KP756615, KP756618	7457-7480	79		Poland	49.4087	20.3905	Central European	Sztencel-Jabłonka et al., 2015	h1, h8 (7457, 7458)	no name	North Balkan	Central	-
KP756622	7457, 7458	79		Poland	49.4087	20.3905	Central European	Sztencel-Jabłonka et al., 2015	h8	no name	North Balkan	Central	inclusive
KP756615	5007	80		Poland	50.0134	19.8107	Central European	Sztencel-Jabłonka et al., 2015	h1	no name	North Balkan	Central	-
KP756615	5250	81		Poland	50.0404	19.911	Central European	Sztencel-Jabłonka et al., 2015	h1	no name	North Balkan	Central	-
KP756615	5922	82		Poland	50.6633	17.9224	Central European	Sztencel-Jabłonka et al., 2015	h1	no name	North Balkan	Central	-
KP756615	6597	83		Poland	50.5667	19.5378	Central European	Sztencel-Jabłonka et al., 2015	h1	no name	North Balkan	Central	-
KP756615	6610	84		Poland	50.7359	18.0888	Central European	Sztencel-Jabłonka et al., 2015	h1	no name	North Balkan	Central	-
KP756615	8127	85		Poland	50.0428	19.9031	Central European	Sztencel-Jabłonka et al., 2015	h1	no name	North Balkan	Central	-
KP756615	8268	86		Poland	50.0388	19.9145	Central European	Sztencel-Jabłonka et al., 2015	h1	no name	North Balkan	Central	-
KP756615	8128, 8343	87		Poland	50.558	16.434	Central European	Sztencel-Jabłonka et al., 2015	h1	no name	North Balkan	Central	-
KP756616	5496-5499, 5916, 5919, 5920	88		Poland	49.4187	22.4404	Balkan	Sztencel-Jabłonka et al., 2015	h2	no name	no name	Central	inclusive
KP756617	5008, 5009, 5635, 5636, 5643, 5917, 5918, 6823	89		Poland	50.5113	22.7892	Balkan	Sztencel-Jabłonka et al., 2015	h3	no name	no name	Central	inclusive
KP756617	5494, 5495	90		Poland	51.654	21.8541	Balkan	Sztencel-Jabłonka et al., 2015	h3	no name	no name	Central	-
KP756617	5634	91		Poland	50.4796	22.9543	Balkan	Sztencel-Jabłonka et al., 2015	h3	no name	no name	Central	-
KP756617	5637	92		Poland	50.5112	22.7892	Balkan	Sztencel-Jabłonka et al., 2015	h3	no name	no name	Central	-
KP756617	5638-5640, 5839, 5841, 5842, 5844, 5845, 6825-6827, 6829-6833	93		Poland	50.4724	22.9943	Balkan	Sztencel-Jabłonka et al., 2015	h3	no name	no name	Central	-
KP756617	5641, 5642	94		Poland	50.3668	23.0785	Balkan	Sztencel-Jabłonka et al., 2015	h3	no name	no name	Central	-
KP756617	5840	95		Poland	50.4633	22.95	Balkan	Sztencel-Jabłonka et al., 2015	h3	no name	no name	Central	-
KP756617	5843	96		Poland	50.4806	23.0499	Balkan	Sztencel-Jabłonka et al., 2015	h3	no name	no name	Central	-
KP756617	6824	97		Poland	50.5182	22.8779	Balkan	Sztencel-Jabłonka et al., 2015	h3	no name	no name	Central	-
KP756618	6281	98		Poland	50.8457	17.8716	Central European	Sztencel-Jabłonka et al., 2015	h4	no name	North Balkan	Central	inclusive
KP756620	6609	99		Poland	53.3728	14.8622	Central European	Sztencel-Jabłonka et al., 2015	h6	no name	North Balkan	Central	inclusive
KP756621	6587	100		Poland	52.2831	14.6272	Central European	Sztencel-Jabłonka et al., 2015	h7	no name	North Balkan	Central	inclusive
KP756621	6588	101		Poland	52.2831	14.6267	Central European	Sztencel-Jabłonka et al., 2015	h7	no name	North Balkan	Central	-
KP756621	6589	102		Poland	52.2828	14.6269	Central European	Sztencel-Jabłonka et al., 2015	h7	no name	North Balkan	Central	-
KP756621	6590	103		Poland	52.4943	14.8189	Central European	Sztencel-Jabłonka et al., 2015	h7	no name	North Balkan	Central	-
KP756621	6603	104		Poland	52.7428	14.7131	Central European	Sztencel-Jabłonka et al., 2015	h7	no name	North Balkan	Central	-
KP756621	7419-7421	105		Poland	52.2561	14.7151	Central European	Sztencel-Jabłonka et al., 2015	h7, h8 (7420)	no name	North Balkan	Central	-
KP756621	7423	106		Poland	52.2708	14.7503	Central European	Sztencel-Jabłonka et al., 2015	h7	no name	North Balkan	Central	-
KP756621	7424-7426, 7428	107		Poland	52.2589	14.6826	Central European	Sztencel-Jabłonka et al., 2015	h7	no name	North Balkan	Central	-
KP756621	7429	108		Poland	52.2583	14.6949	Central European	Sztencel-Jabłonka et al., 2015	h7	no name	North Balkan	Central	-
KP756619	6598-6600	109		Czech Republic	50.3465	13.0179	Central European	Sztencel-Jabłonka et al., 2015	h5	no name	North Balkan	Central	inclusive
MH382913	2487	110	Řadovy	Czech Republic	49.628	14.276	Central European	This study		no name	North Balkan	Central	inclusive/exclusive
MH382918	1056JAB	111	Studenec	Czech Republic	49.224	16.059	Central European	This study		no name	North Balkan	Central	inclusive/exclusive
MH382930	2404JAB	112	Hoštětín	Czech Republic	49.053	17.872	Central European	This study		no name	North Balkan	Central	inclusive/exclusive
KP756617	SLOH3	113	SE Slovakia	Slovakia	48.96	22.021	Balkan	Sztencel-Jabłonka et al., 2015	h3	no name	no name	Central	-
MH382907	1515	114	Borský Mikuláš	Slovakia	48.629	17.207	Central European	This study		no name	North Balkan	Central	inclusive/exclusive
MH382908	1605	115	Jasenie	Slovakia	48.888	19.434	Central European	This study		no name	North Balkan	Central	inclusive/exclusive
MH557091	1709	116	Svetlice	Slovakia	49.1878	22.0503	Balkan	This study		no name	no name	Central	inclusive/exclusive
MH382909	1713	117	Divina	Slovakia	49.273	18.699	Central European	This study		no name	North Balkan	Central	inclusive/exclusive
MH382910	2393	118	Beňuš-Gašparovo	Slovakia	48.827	19.744	Central European	This study		no name	North Balkan	Central	inclusive/exclusive
MH382921	1450JAB	119	NPR Šúr	Slovakia	48.23	17.206	Central European	This study		no name	North Balkan	Central	inclusive/exclusive
	SLOSLEN038	120	Selnica	Slovenia	46.5512	15.4884	Central European	Galarza et al., 2015		no name	North Balkan	Central	inclusive
MH382925	2073JAB	121	NP Triglav	Slovenia	46.444	13.769	Central European	This study		no name	North Balkan	Central	inclusive/exclusive
MH382926	2075JAB	122	Trenta	Slovenia	46.385	13.752	Central European	This study		no name	North Balkan	Central	inclusive/exclusive
MH382927	2076JAB	122	Trenta	Slovenia	46.385	13.752	Central European	This study		no name	North Balkan	Central	inclusive/exclusive
	YUGZARA034	123	Zadar	Croatia	44.12	15.25	Central European	Galarza et al., 2015		no name	North Balkan	Central	inclusive
KP756615	6594-6596	124		Croatia	45.3309	17.0217	Central European	Sztencel-Jabłonka et al., 2015	h1	no name	North Balkan	Central	inclusive
MH382912	2479	125	Nevesinje	Bosnia and Herzegovina	43.241	18.094	Central European	This study		no name	North Balkan	Central	inclusive/exclusive
MH382923	2037JAB	126	Durmitor Mts.	Montenegro	43.133	18.951	Balkan	This study		no name	no name	Central	inclusive/exclusive
MH382924	2038JAB	126	Durmitor Mts.	Montenegro	43.133	18.951	Balkan	This study		no name	no name	Central	inclusive/exclusive
KM435304	MACEDONI42	127	Resen	Macedonia	41.0895	21.0144	Balkan	Galarza et al., 2015		no name	no name	Central	inclusive
MH382917	1014JAB	128	Korab Mts.	Macedonia	41.681	20.527	Balkan	This study		no name	no name	Central	inclusive/exclusive
MH382922	1647JAB	129	Galichica Mts.	Macedonia	40.964	20.811	Balkan	This study		no name	no name	Central	inclusive/exclusive
EU022647	E27104.3	130	Kazarma, Kardhista	Greece	38.9684	22.3844	Balkan	Santos et al., 2008		no name	no name	Central	inclusive
MH382916	741JAB	131	Asenovgrad	Bulgaria	40.983	24.875	Balkan	This study		no name	no name	Central	inclusive/exclusive
MH382942	2481JAB	132	Zhilentsi	Bulgaria	42.245	22.636	Balkan	This study		no name	no name	Central	inclusive/exclusive
MH382943	2484JAB	133	Maglenishki rid	Bulgaria	41.335	25.848	Balkan	This study		no name	no name	Central	inclusive/exclusive
MH382944	2485JAB	134	Petrohan	Bulgaria	43.108	23.151	Balkan	This study		no name	no name	Central	inclusive/exclusive
MH382945	2489JAB	135	Senokos	Bulgaria	41.83	23.219	Balkan	This study		no name	no name	Central	inclusive/exclusive
MH382946	2492JAB	136	Zdravets	Bulgaria	41.995	24.725	Balkan	This study		no name	no name	Central	inclusive/exclusive
MH382947	2493JAB	137	Vitata	Bulgaria	42.94	25.22	Balkan	This study		no name	no name	Central	inclusive/exclusive
MH382931	2443JAB	138	Gernik	Romania	44.754	21.791	Balkan	This study		no name	no name	Central	inclusive/exclusive
MH382914	497JAB	139	Ciuguzel - Cicard	Romania	46.274	23.903	Balkan	This study		no name	no name	Central	inclusive/exclusive
KM435303	LATJELGA58	140	Kameru NP	Latvia	56.8719	23.4663	Eastern	Galarza et al., 2015		no name	Eastern (part)	Eastern	inclusive
	LATSLITE01	141	Slitere NP	Latvia	57.5982	22.3264	Eastern	Galarza et al., 2015		no name	Eastern (part)	Eastern	inclusive
MH382920	1182JAB	142	Bataľnoe	Crimea	45.145	35.612	Eastern	This study		no name	Eastern (part)	Eastern	inclusive/exclusive
MH382928	2379JAB	143	Pchelinoe	Crimea	44.893	34.595	Eastern	This study		no name	Eastern (part)	Eastern	inclusive/exclusive
MH382929	2380JAB	144	Simferopol	Crimea	44.943	34.132	Eastern	This study		no name	Eastern (part)	Eastern	inclusive/exclusive
KM435305	RUSSTAVR51, RUSSTAVR52	145	Stavropol region	Russia	43.8751	42.8393	Eastern	Galarza et al., 2015		no name	Eastern (part)	Eastern	inclusive
	RUSADUGE49	146	Adygea	Russia	44.3201	40.2516	Eastern	Galarza et al., 2015		no name	Eastern (part)	Eastern	inclusive
	RUSKRASN08, RUSKRASN48	147	Krasnodar	Russia	45.0275	38.9626	Eastern	Galarza et al., 2015		no name	Eastern (part)	Eastern	inclusive
	RUSRORTO47	148	Rostov	Russia	48.2473	41.03	Eastern	Galarza et al., 2015		no name	Eastern (part)	Eastern	inclusive
	RUSROSTO46	149	Rostov	Russia	47.225	39.3	Eastern	Galarza et al., 2015		no name	Eastern (part)	Eastern	inclusive
EU022642	E17116.3	150	Kalininskiy, Rostov	Russia	49.5654	41.8489	Eastern	Santos et al., 2008		no name	Eastern (part)	Eastern	inclusive
EU022643	E17116.5	151	Volkonschino, Penza	Russia	53.2	44.99	Eastern	Santos et al., 2008		no name	Eastern (part)	Eastern	inclusive
EU022644	E17116.6	152	Matveyevskiy, Rostov	Russia	49.59	42.08	Eastern	Santos et al., 2008		no name	Eastern (part)	Eastern	inclusive
EU022645	E17116.2	153	Vysha, Republic of Mordovia	Russia	54.2369	44.0683	Eastern	Santos et al., 2008		no name	Eastern (part)	Eastern	inclusive
KM435297	ABKAZIA050	154	Aguripsta	Abkhazia	43.3866	40.8071	Eastern	Galarza et al., 2015		no name	Eastern (part)	Eastern	inclusive
KX694868	ROM 26536	155	Tbilisi	Georgia	41.8	44.71	Transcaucasian	Alencar et al. 2016		not recovered	Eastern (part)	Eastern	inclusive
KM435302	GEORGIA045	156	Ajaria	Georgia	41.6467	42.15	Transcaucasian	Galarza et al., 2015		not recovered	Eastern (part)	Eastern	inclusive
KP756623	5320	157		Armenia	40.8017	44.8915	Transcaucasian	Sztencel-Jabłonka et al., 2015	h9	not recovered	Eastern (part)	Eastern	inclusive
KP756623	6545	158		Armenia	40.5831	44.6684	Transcaucasian	Sztencel-Jabłonka et al., 2015	h9	not recovered	Eastern (part)	Eastern	-
KP756623	6559	159		Armenia	40.5842	44.6914	Transcaucasian	Sztencel-Jabłonka et al., 2015	h9	not recovered	Eastern (part)	Eastern	-
KP756623	8345	160		Armenia	40.7408	44.863	Transcaucasian	Sztencel-Jabłonka et al., 2015	h9	not recovered	Eastern (part)	Eastern	-
KP756624	6564	161		Armenia	40.6842	45.1731	Transcaucasian	Sztencel-Jabłonka et al., 2015	h10	not recovered	Eastern (part)	Eastern	inclusive
AY486930	HLMD RA-2608	162	Ilgaz	Turkey	40.9269	33.6152	Anatolian 1	Nagy et al., 2004		not recovered	no name	not recovered	inclusive
MH382932	2459JAB	163	Ortaçımağıl	Turkey	40.109	40.601	Anatolian 1	This study		not recovered	no name	not recovered	inclusive/exclusive
MH382933	2460JAB	164	Küçükotlukbeli	Turkey	40.016	39.982	Anatolian 2	This study		not recovered	not recovered	not recovered	inclusive/exclusive
MH382934	2464JAB	165	Between Niksar and Başçiftlik	Turkey	40.526	37.147	Anatolian 1	This study		not recovered	no name	not recovered	inclusive/exclusive
MH382935	2467JAB	166	Güneyce	Turkey	40.821	40.475	Anatolian 1	This study		not recovered	no name	not recovered	inclusive/exclusive
MH382936	2468JAB	167	Söğüteli	Turkey	40.542	38.975	Anatolian 1	This study		not recovered	no name	not recovered	inclusive/exclusive
MH382937	2469JAB	168	Between Mecidiye and Yarbaşı	Turkey	39.89	39.583	Anatolian 1	This study		not recovered	no name	not recovered	inclusive/exclusive
MH382938	2470JAB	168	Between Mecidiye and Yarbaşı	Turkey	39.89	39.583	Anatolian 1	This study		not recovered	no name	not recovered	inclusive/exclusive
MH382939	2471JAB	169	Çilhoroz	Turkey	39.884	39.724	Anatolian 1	This study		not recovered	no name	not recovered	inclusive/exclusive
MH382940	2472JAB	169	Çilhoroz	Turkey	39.884	39.724	Anatolian 1	This study		not recovered	no name	not recovered	inclusive/exclusive
MH382941	2473JAB	169	Çilhoroz	Turkey	39.884	39.724	Anatolian 1	This study		not recovered	no name	not recovered	inclusive/exclusive
MH382948	Ca1Iran	170	Varewasht Mts.	Iran	36.274	51.401	Iranian 2	This study		not recovered	not recovered	not recovered	inclusive/exclusive
MH382949	Ca2Iran	171	Damash	Iran	36.762	49.805	Iranian 2	This study		not recovered	not recovered	not recovered	inclusive/exclusive
MH382950	Ca3Iran	172	Veresk	Iran	35.841	52.95	Iranian 1	This study		not recovered	not recovered	not recovered	inclusive/exclusive
