# Supplementary material
Source: publisher figshare collection journal article supplement (https://brill.figshare.com/articles/dataset/_/7041791)
Supplement: Supplementary file 2 [file 1]

## Cryptic diversity in the smooth snake (*Coronella austriaca*)

Daniel Jablonski<sup>1,\*</sup>, Zoltán T. Nagy<sup>2</sup>, Aziz Avci<sup>3</sup>, Kurtuluş Olgun<sup>3</sup>, Oleg V.

Kukushkin<sup>4,5</sup>, Barbod Safaei-Mahroo<sup>6</sup>, David Jandzik<sup>1,7,\*</sup>

**Abstract.** The smooth snake, *Coronella austriaca*, is a common snake species widespread in the Western Palearctic region. It does not form conspicuous morphological variants and, although several evolutionary lineages have been distinguished based on the analyses of the mitochondrial DNA sequences, only two subspecies with very limited distribution have been traditionally recognized. Here we present an mtDNA phylogeography of the species using geographically extended sampling while incorporating biogeographically important areas that have not been analyzed before, such as Anatolia, Crimea, and Iran. We find that the smooth snake comprises 14 distinct phylogenetic clades with unclear mutual relationships, characterized by complex genetic structure and relatively deep divergences; some of them presumably of Miocene origin. In general, the biogeographic pattern is similar to other Western Palearctic reptiles and illustrates the importance of the main European peninsulas as well as the Anatolian mountains, Caucasus, and Alborz Mts. in Iran for the evolution of the present-day diversity. Considerable genetic structure present in the smooth snake populations within these large areas indicates the existence of several regional Plio-Pleistocene refugia that served as reservoirs for dispersal and population expansions after the glacial periods. The current taxonomy of *C. austriaca* does not reflect the rich genetic diversity, deep divergences, and overall evolutionary history revealed in our study and requires a thorough revision. This will only be possible with an even higher-resolution sampling and integrative approach, combining analyses of multiple genetic loci with morphology, and possibly other aspects of the smooth snake biology.

**Keywords:** Asia, Colubridae, Europe, glacial refugia, phylogeny, refugia-within-refugia, Serpentes, speciation.

1 - Department of Zoology, Comenius University in Bratislava, Mlynská dolina, Ilkovičova 6, 842 15 Bratislava, Slovakia

2 - Hielscherstraße 25, 13158 Berlin, Germany

3 - Department of Biology, Faculty of Science and Arts, Adnan Menderes University, 09010 Aydın, Turkey

4 - Department of Herpetology, Zoological Institute of the Russian Academy of Sciences, Universitetskaya emb. 1, 199034 St. Petersburg, Russia

5 - Department of Biodiversity Studies and Ecological Monitoring, T.I. Vyazemsky Karadag Research Station – Nature Reserve of the Russian Academy of Sciences, Nauki 24, 298188 Theodosia, Crimea

6 - Pars Herpetologists Institute, 1st Floor, No. 5, Corner of third Jahad alley, Arash St., Jalal-e Ale-Ahmad Boulevard, Tehran, Iran

7 - Department of Zoology, Charles University in Prague, Vinicna 7, 128 44 Prague, Czech Republic

\*Corresponding authors; e-mail: daniel.jablonski@balcanica.cz, david.jandzik@uniba.sk

### **Supplementary material**
